# Supplementary material for: The DizzyQuest Combined with Accelerometry: Daily Physical Activities and Limitations among Patients with Bilateral Vestibulopathy Due to DFNA9
Source: MDPI journal article supplement (doi:10.3390/jcm13041131), 2024-02-17
Supplement: s1 [file s1]

## Supplementary Material S1

### DizzyQuest questionnaires

Below the specific set of questionnaires of the within-day and evening questionnaires. For questions about symptoms a seven-point Likert scale is used, ranging from 1 (not at all) to 7 (very).

#### Within-day questionnaire

| Question number | Question                                 | Answer scale                                   | Answer options                                                                                                        |
|-----------------|------------------------------------------|------------------------------------------------|-----------------------------------------------------------------------------------------------------------------------|
| 1.              | I feel relaxed                           | Likert 7                                       | 1 = not at all, 4 = mildly, 7 = very much                                                                             |
| 2.              | I feel cheerful                          | Likert 7                                       | 1 = not at all, 4 = mildly, 7 = very much                                                                             |
| 3.              | I feel irritated                         | Likert 7                                       | 1 = not at all, 4 = mildly, 7 = very much                                                                             |
| 4.              | I feel confident                         | Likert 7                                       | 1 = not at all, 4 = mildly, 7 = very much                                                                             |
| 5.              | I am worrying, about things              | Likert 7                                       | 1 = not at all, 4 = mildly, 7 = very much                                                                             |
| 6.              | I feel anxious                           | Likert 7                                       | 1 = not at all, 4 = mildly, 7 = very much                                                                             |
| 7.              | I am afraid to fall                      |                                                |                                                                                                                       |
| 8.              | I feel tired                             | Likert 7                                       | 1 = not at all, 4 = mildly, 7 = very much                                                                             |
| 9.              | I generally feel well at the moment      | Likert 7                                       | 1 = not at all, 4 = mildly, 7 = very much                                                                             |
| 10.             | I am able to concentrate well            | Likert 7                                       | 1 = not at all, 4 = mildly, 7 = very much                                                                             |
| 11.             | I feel in control                        | Likert 7                                       | 1 = not at all, 4 = mildly, 7 = very much                                                                             |
| 12.             | What am I doing (just before the beep)   | Multiple choice                                | Resting, Work/ school, Housekeeping, Hygiene, Eating/ drinking, Active relaxation, Passive relaxation, Something else |
| 13.             | I feel I'm being active                  | Likert 7                                       | 1 = not at all, 4 = mildly, 7 = very much                                                                             |
| 14.             | I can do this well                       | Likert 7                                       | 1 = not at all, 4 = mildly, 7 = very much                                                                             |
| 15.             | I'd rather be doing something else       | Likert 7                                       | 1 = not at all, 4 = mildly, 7 = very much                                                                             |
| 16.             | Where am I?                              | Multiple choice                                | At home, at someone else's home, work, school, public place, transport                                                |
| 17.             | Who am I with?                           | Multiple choice<br>(Multiple answers possible) | Partner, family resident, Family non-resident, friends, colleagues, acquaintances, strangers, others, nobody          |
| 18.             | I like this (social situation)           | Likert 7                                       | 1 = not at all, 4 = mildly, 7 = very much                                                                             |
| 19.             | I have an attack at this moment          | Multiple choice                                | Yes, No                                                                                                               |
| 20.             | Since the last BEEP I have had an attack | Multiple choice                                | Yes, No                                                                                                               |

|     |                                 |                 |                                                                                                                                                                                                                                                                                                                                                                                                                                                                         |
|-----|---------------------------------|-----------------|-------------------------------------------------------------------------------------------------------------------------------------------------------------------------------------------------------------------------------------------------------------------------------------------------------------------------------------------------------------------------------------------------------------------------------------------------------------------------|
| 21. | Since the last beep I have used | Multiple choice | Caffeine, Nicotine, Alcohol, Medication, Other substance, Tea, Chocolate, Something else, Nothing of these                                                                                                                                                                                                                                                                                                                                                              |
| 22. | I now suffer from               | Multiple choice | Dizziness, Nausea, Imbalance and/or feeling drunk, Difficulty hearing with 1 or both ears, Ringing in 1 or both ears (tinnitus), Aural fullness, Headache, Light sensitivity, Sound sensitivity, Hypersensitivity for movements and/or hustle and bustle going on around me, Seeing flashes of light and/or zigzag lines, Numbness and/or tingling in arms and/or legs and/or face, Problems with clarity of vision while moving, Difficulty reading, None of the above |
| 23. | This beep bothered me           | Likert 7        | 1 = not at all, 4 = mildly, 7 = very much                                                                                                                                                                                                                                                                                                                                                                                                                               |

#### Evening- questionnaire

| Question number | Question                                                | Answer scale | Answer options                            |
|-----------------|---------------------------------------------------------|--------------|-------------------------------------------|
| 1.              | I considered this a normal day                          | Likert 7     | 1 = not at all, 4 = mildly, 7 = very much |
| 2.              | Overall I felt good today                               | Likert 7     | 1 = not at all, 4 = mildly, 7 = very much |
| 3.              | Overall I felt tired today                              | Likert 7     | 1 = not at all, 4 = mildly, 7 = very much |
| 4.              | Overall I felt relaxed today                            | Likert 7     | 1 = not at all, 4 = mildly, 7 = very much |
| 5.              | Overall I worried a lot today                           | Likert 7     | 1 = not at all, 4 = mildly, 7 = very much |
| 6.              | Overall I managed to concentrate well today             | Likert 7     | 1 = not at all, 4 = mildly, 7 = very much |
| 7.              | Today I experienced dizziness                           | Likert 7     | 1 = not at all, 4 = mildly, 7 = very much |
| 8.              | Today I experienced nausea                              | Likert 7     | 1 = not at all, 4 = mildly, 7 = very much |
| 9.              | Today I experience balance problems                     | Likert 7     | 1 = not at all, 4 = mildly, 7 = very much |
| 10.             | Today I experienced hearing loss on the left hand side  | Likert 7     | 1 = not at all, 4 = mildly, 7 = very much |
| 11.             | Today I experienced hearing loss on the right hand side | Likert 7     | 1 = not at all, 4 = mildly, 7 = very much |
| 12.             | Today I experienced tinnitus on the left hand side      | Likert 7     | 1 = not at all, 4 = mildly, 7 = very much |
| 13.             | Today I experienced tinnitus on the right hand side     | Likert 7     | 1 = not at all, 4 = mildly, 7 = very much |
| 14.             | Today I experienced aural fullness in one or two ears   | Likert 7     | 1 = not at all, 4 = mildly, 7 = very much |
| 15.             | Today I experienced headaches                           | Likert 7     | 1 = not at all, 4 = mildly, 7 = very much |

|     |                                                                                          |                                         |                                                                                                                                  |
|-----|------------------------------------------------------------------------------------------|-----------------------------------------|----------------------------------------------------------------------------------------------------------------------------------|
| 16. | Today I experienced light hypersensitivity                                               | Likert 7                                | 1 = not at all, 4 = mildly, 7 = very much                                                                                        |
| 17. | Today I experienced sound hypersensitivity                                               | Likert 7                                | 1 = not at all, 4 = mildly, 7 = very much                                                                                        |
| 18. | Today I experienced light flashes, zigzag lines, coloured and/or black dots in my vision | Likert 7                                | 1 = not at all, 4 = mildly, 7 = very much                                                                                        |
| 19. | Today I experienced a strange feeling in my arms, legs and/or face                       | Likert 7                                | 1 = not at all, 4 = mildly, 7 = very much                                                                                        |
| 20. | Today I experienced problems when I moved                                                | Likert 7                                | 1 = not at all, 4 = mildly, 7 = very much                                                                                        |
| 21. | Today I had difficulty reading                                                           | Likert 7                                | 1 = not at all, 4 = mildly, 7 = very much                                                                                        |
| 22. | How many attacks of dizziness, nausea and/or hearing loss did you have today?            | Multiple choice                         | 0,1,2,3 or more (if 0, then directly to question 26)                                                                             |
| 23. | Did the first attack of today already start yesterday?                                   | Multiple choice                         | Yes/no                                                                                                                           |
| 24. | The attack(s) was/were triggered by:                                                     | Multiple choice (every option possible) | Spontaneous, head- and/or body movement, strong sensations (light, sound, busy environment), stress, something else (open field) |
| 25. | I could not function today due to the attack(s)                                          | Multiple choice                         | Less than 20 minutes, between 20 minutes and 3 hours, between 3 hours and 12 hours, over 12 hours                                |
| 26. | How much were you hindered in your daily life                                            | Likert 7                                | 1 = not at all, 4 = mildly, 7 = very much<br>(if 1, then end of questionnaire)                                                   |
| 27. | I was mostly hindered in:                                                                | Multiple choice (pick one option)       | Work/study, household tasks, social engagements, travel, hobbies, sports/movement, sleep                                         |

---
